# Supplementary material for: TcTI, a Kunitz-type trypsin inhibitor from cocoa associated with defense against pathogens
Source: PubMed Central journal article supplement (PMC8758671; doi:10.1038/s41598-021-04700-y), 2022-01-13

**Supplementary figure 3:** 2D gels of the protein profile of different stages of Mp infection in resistant and susceptible cocoa meristems . **a:** Catongo 72 HAI non -inoculated [mock inoculated control ] . **b:** Catongo 72 HAI. **c:** TSH1188 72 HAI non -inoculate d [mock inoculated control ] . **d:** TSH1188 72 HAI. **e:** Catongo 45 DAI non -inoculated [mock inoculated control ] . **f:** Catongo 45 DAI. **g:** TSH1188 45 DAI non -inoculated [mock inoculated control ] . **h:** TSH1188 45 DAI.

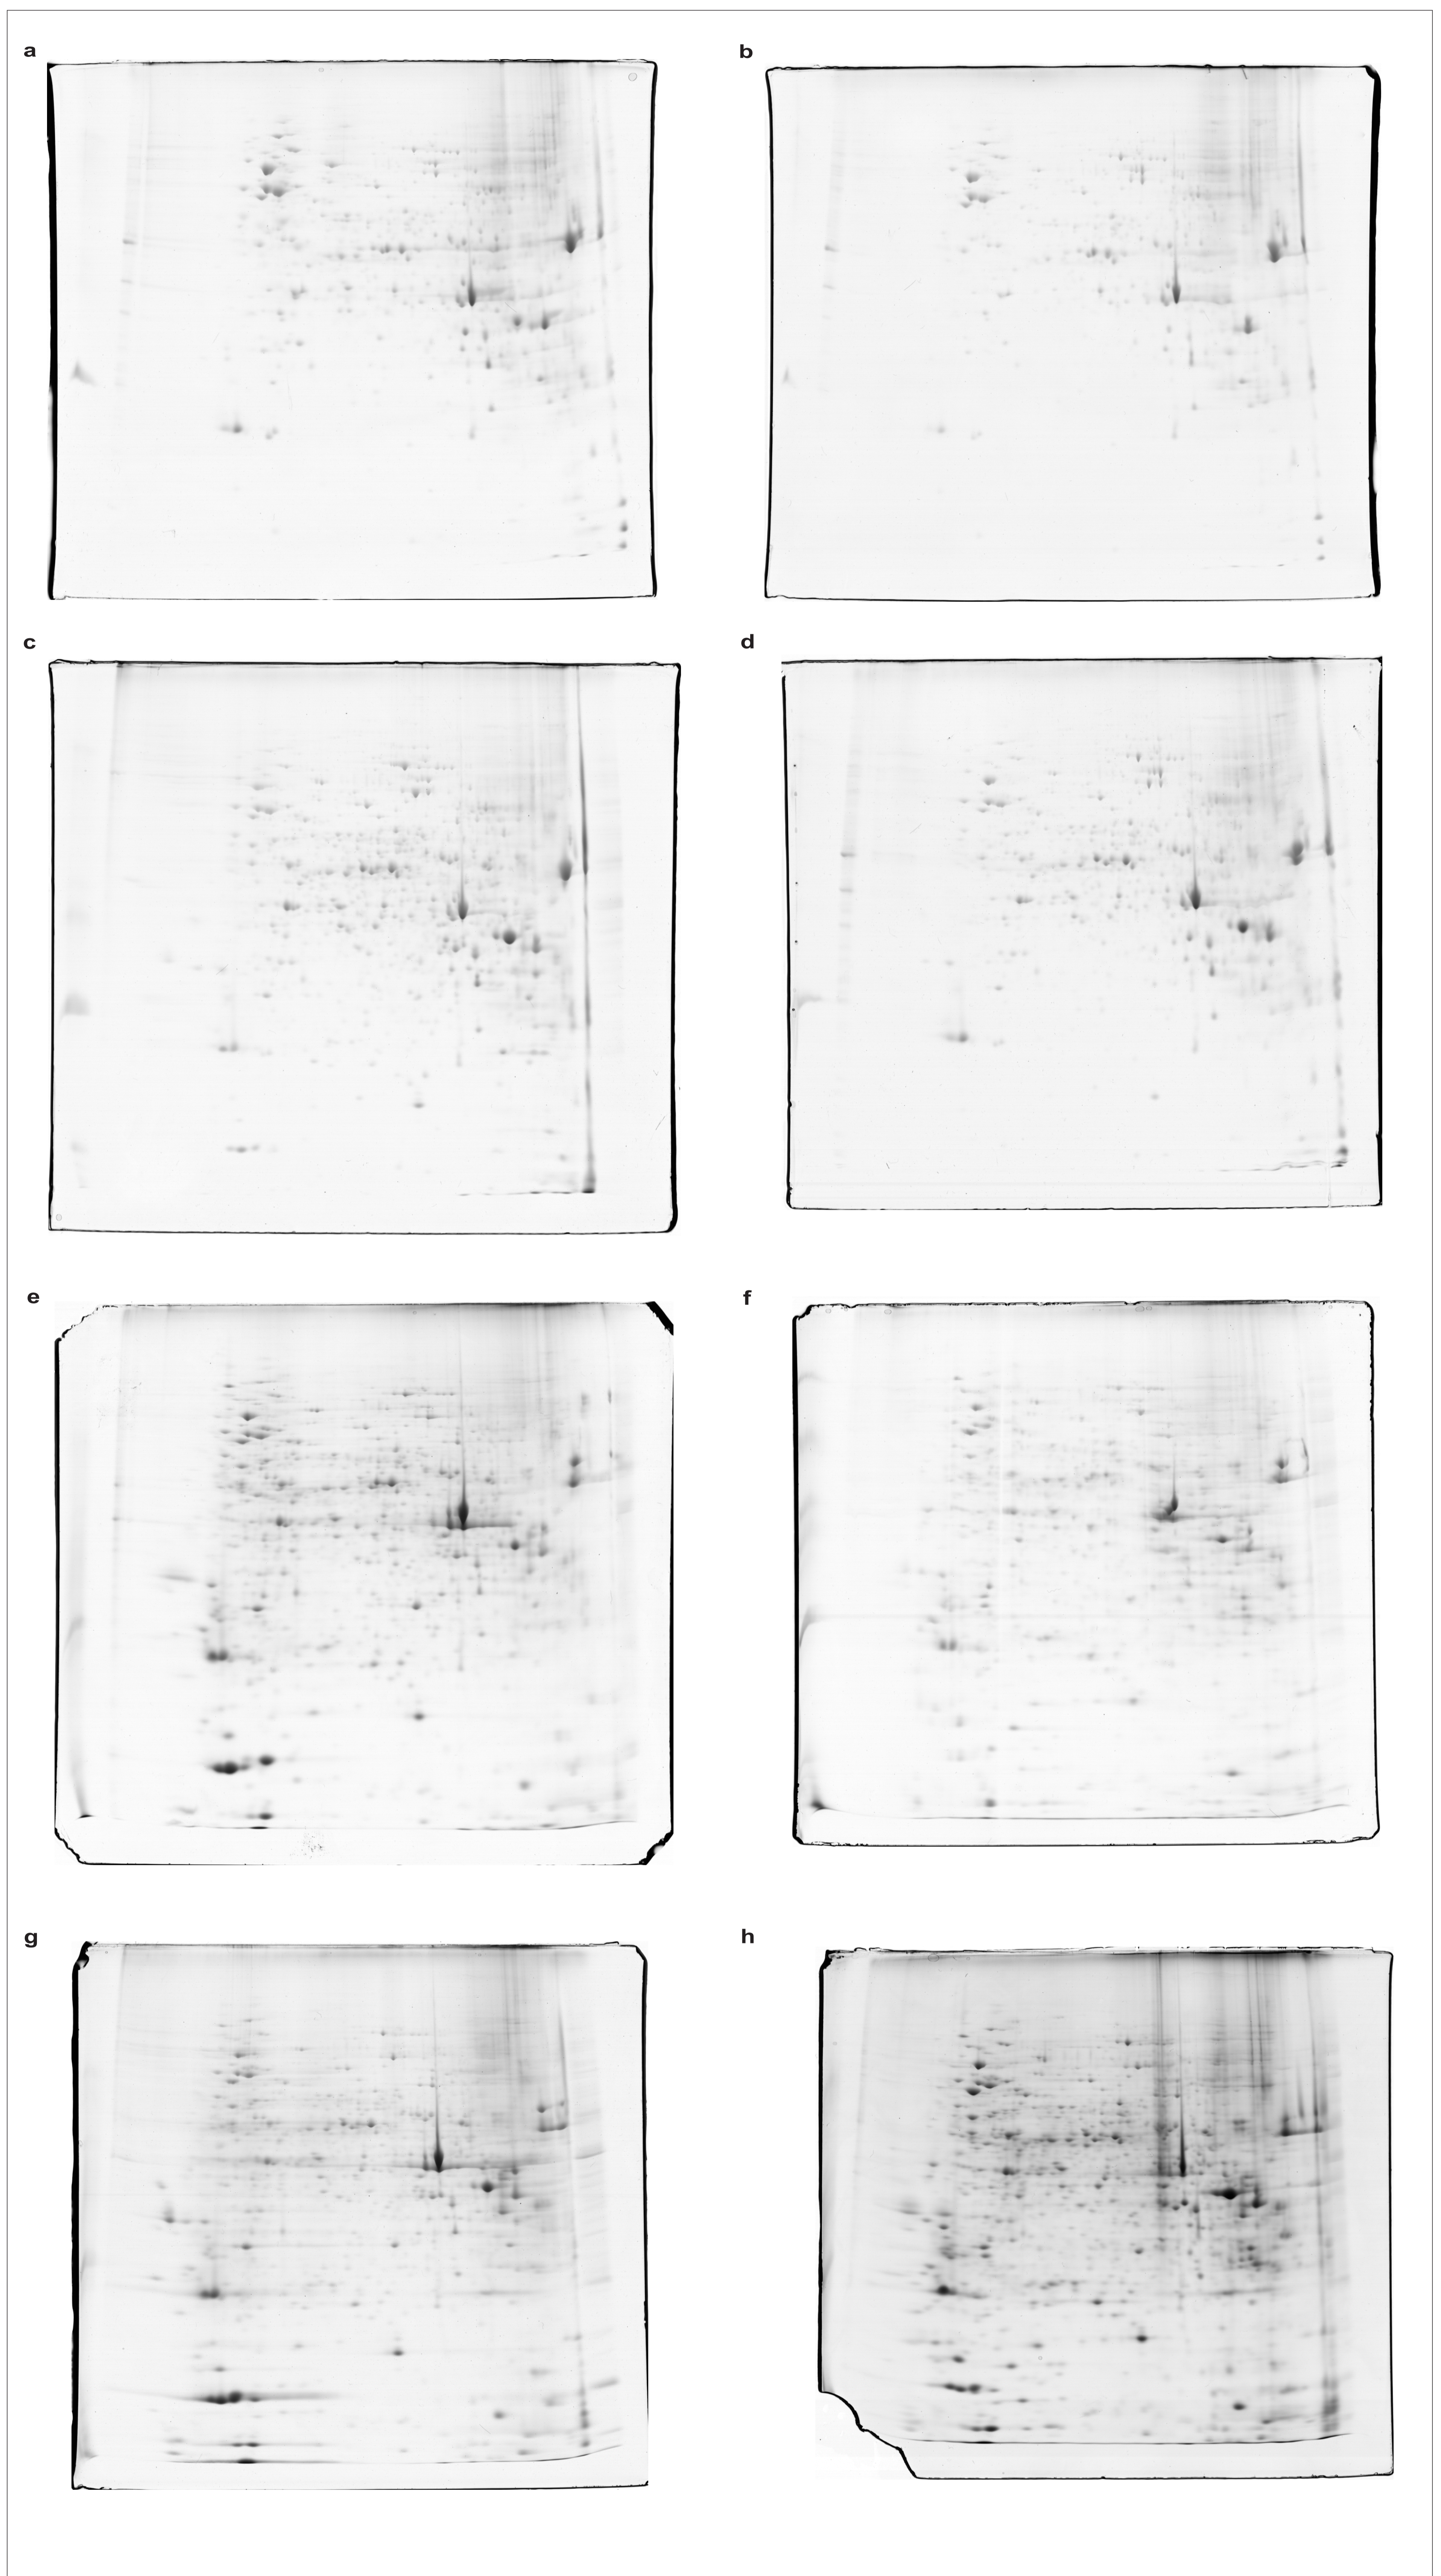

Supplement: 41598_2021_4700_MOESM3_ESM.pdf [file 41598_2021_4700_MOESM3_ESM.pdf]
