# Supplementary material for: TcTI, a Kunitz-type trypsin inhibitor from cocoa associated with defense against pathogens
Source: PubMed Central journal article supplement (PMC8758671; doi:10.1038/s41598-021-04700-y), 2022-01-13

**Supplementary figure 4:** Immunodetection of trypsin inhibitors in cocoa meristem of the TSH1188 and Catongo varieties. **a:** Initial stages of 1 and 5 DAI (days after infection); **b:** Final Stages 45 and 60 DAI indicate the periods of infection with *M. perniciosa* and its controls. CAT; Catongo (susceptible variety), TSH; TSH1188 (resistant variety).

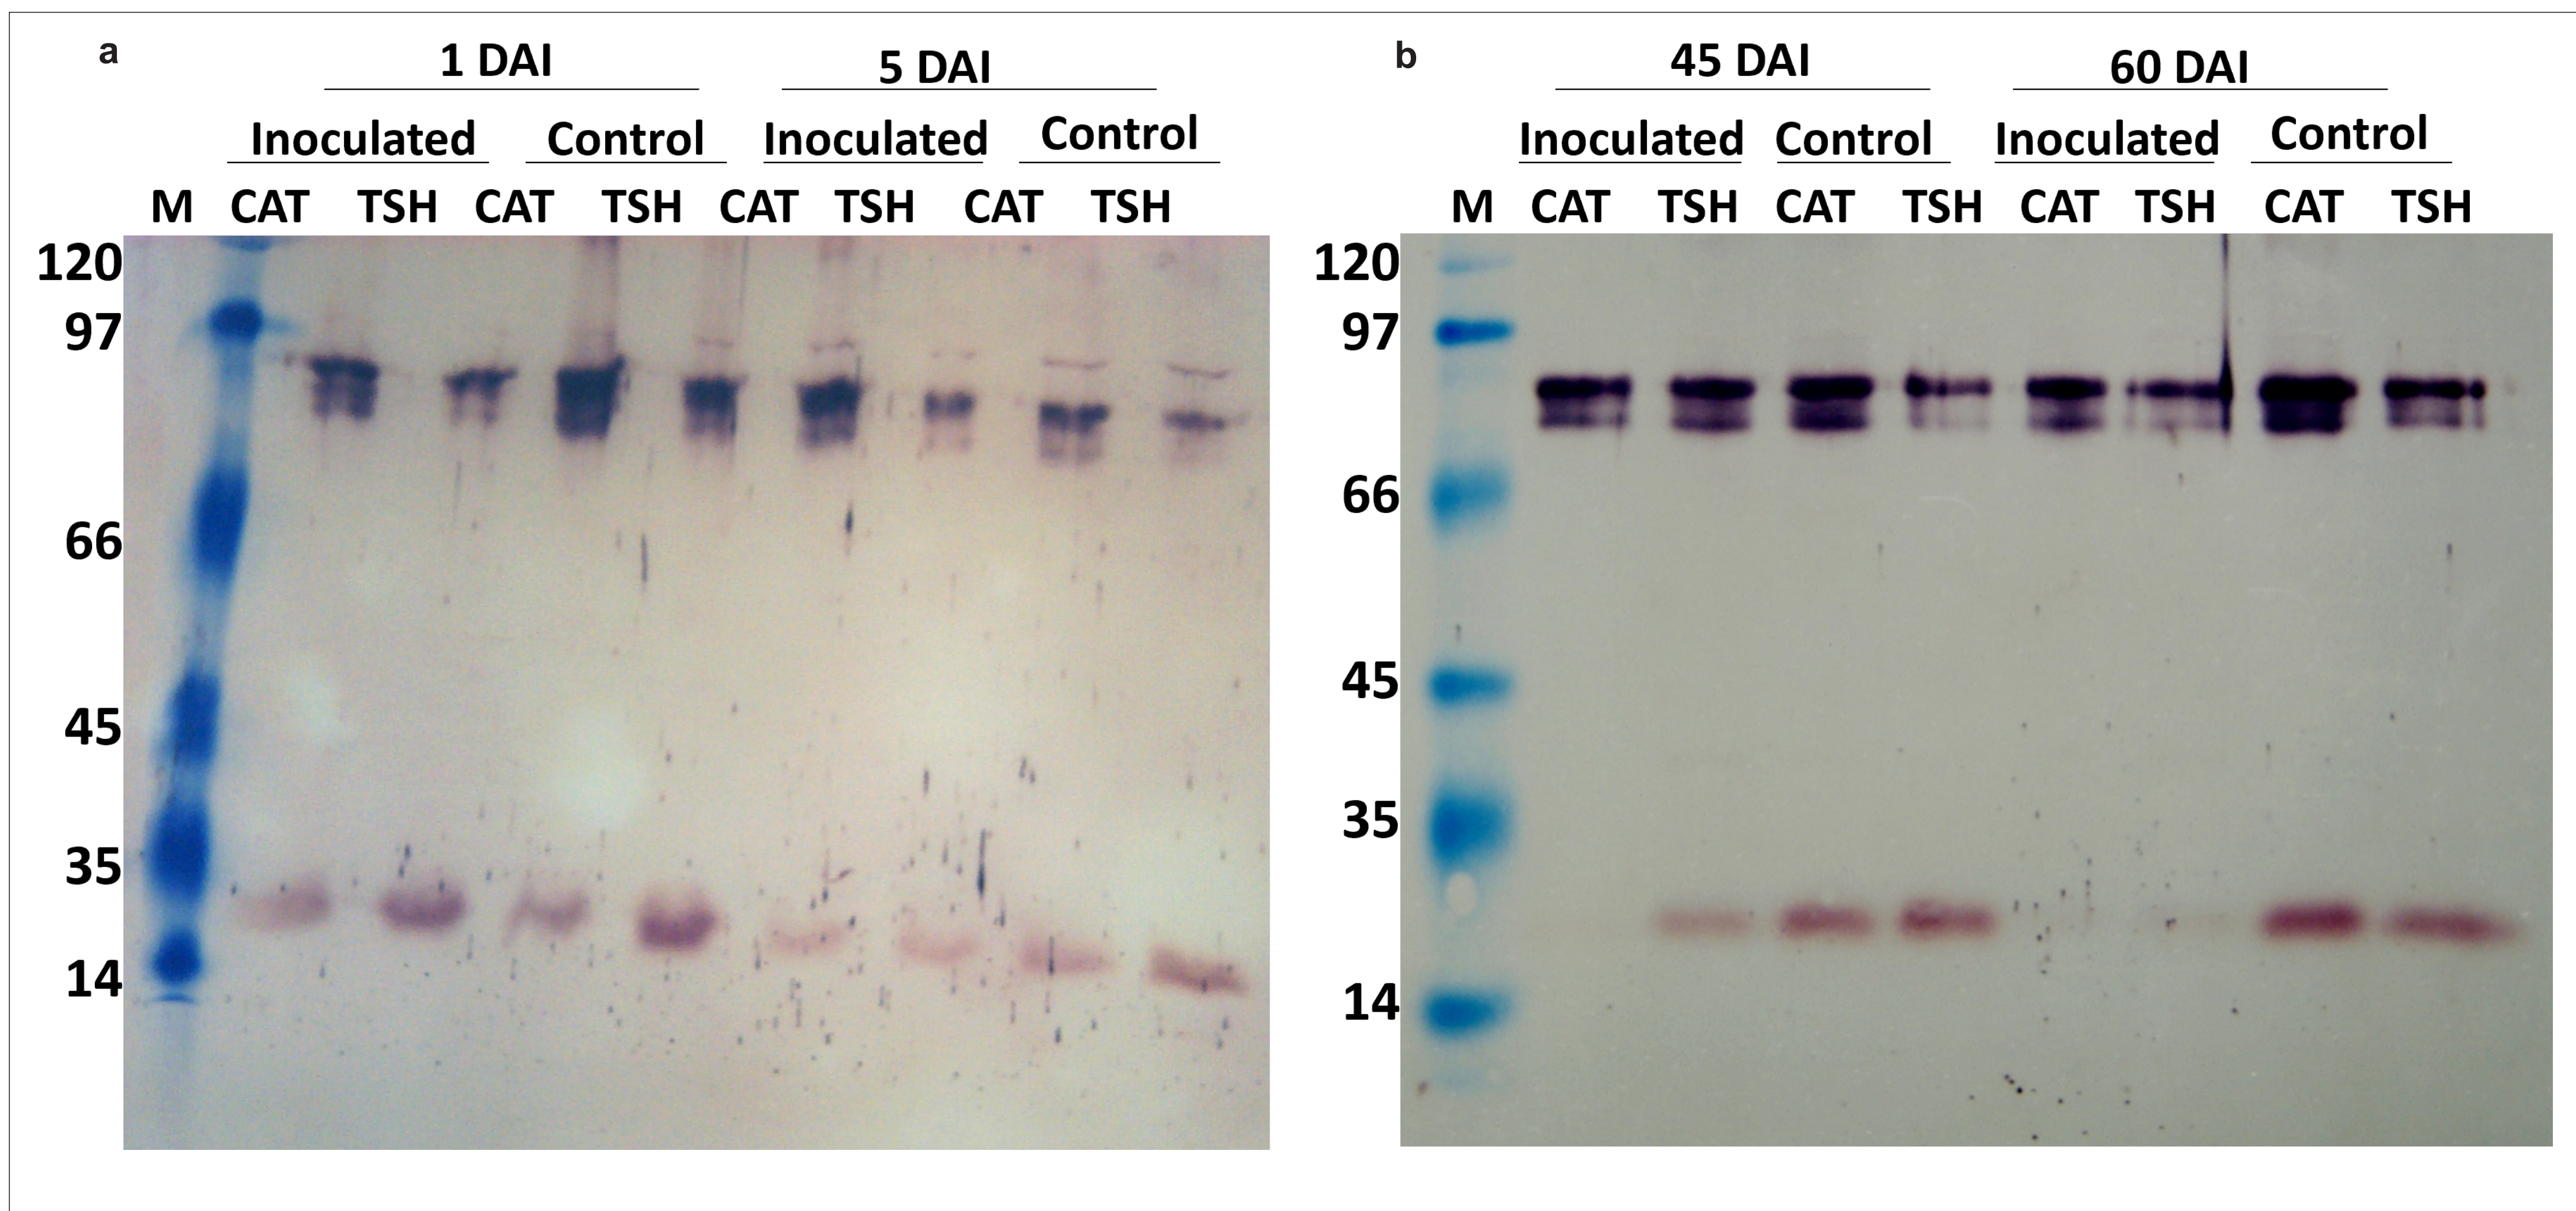

Supplement: 41598_2021_4700_MOESM4_ESM.pdf [file 41598_2021_4700_MOESM4_ESM.pdf]
